# Supplementary material for: Systematic Review of Incidence Studies of Pneumonia in Persons with Spinal Cord Injury
Source: MDPI journal article supplement (doi:10.3390/jcm11010211), 2021-12-31
Supplement: s1 [file s1]

Supplementary File S5

Table S5.A Sensitivity analyses where the time under risk for the patients with pneumonia was set to 0 (i.e. as if they had the pneumonia all at the first day).

| Variable                            | Univariable Meta-Regression |               |         | Multivariable Meta-Regression |                |         |
|-------------------------------------|-----------------------------|---------------|---------|-------------------------------|----------------|---------|
|                                     | Incidence Rate Ratio        | 95% CI        | p-value | Incidence Rate Ratio          | 95% CI         | p-value |
| <b>Setting</b>                      |                             |               |         |                               |                |         |
| Post-Rehab (Reference)              | 1.00                        |               |         | 1.00                          |                |         |
| Acute                               | 3.39                        | 0.68 to 16.9  | 0.137   | 0.57                          | 0.08 to 4.16   | 0.578   |
| ICU                                 | 12.11                       | 2.63 to 55.65 | 0.001   | 2.78                          | 0.26 to 29.29  | 0.394   |
| Long-Term Ventilation               | 1.38                        | 0.08 to 22.57 | 0.821   | 0.89                          | 0.03 to 30.19  | 0.948   |
| Mixed                               | 4.53                        | 0.28 to 73.29 | 0.287   | 22.09                         | 1.07 to 456.06 | 0.045   |
| Rehab                               | 3.03                        | 0.33 to 27.51 | 0.325   | 0.76                          | 0.06 to 9.32   | 0.830   |
| <b>Level of Injury</b>              |                             |               |         |                               |                |         |
| Persons w. Paraplegia (Reference)   | 1.00                        |               |         |                               |                |         |
| Mixed, > 50% Persons w. Paraplegia  | 0.32                        | 0.01 to 8.84  | 0.503   | 0.19                          | 0.01 to 0.01   | 0.367   |
| Mixed, > 50% Persons w. Tetraplegia | 2.88                        | 0.16 to 50.73 | 0.470   | 3.58                          | 0.29 to 0.29   | 0.323   |
| Persons w. Tetraplegia              | 2.85                        | 0.17 to 48.72 | 0.469   | 2.22                          | 0.17 to 0.17   | 0.545   |
| Mixed, with unknown Proportion      | 0.48                        | 0.02 to 11.12 | 0.647   | 2.07                          | 0.1 to 0.1     | 0.633   |
| <b>Ventilation</b>                  |                             |               |         |                               |                |         |
| Not mentioned (Reference)           | 1.00                        |               |         |                               |                |         |
| Mixed                               | 6.15                        | 2.09 to 18.12 | 0.001   | 5.93                          | 1.46 to 24.1   | 0.013   |
| Ventilated                          | 5.24                        | 1.79 to 15.33 | 0.002   | 1.93                          | 0.45 to 8.27   | 0.374   |

# Tracheostomy

|                |      |               |       |      |              |       |  |
|----------------|------|---------------|-------|------|--------------|-------|--|
| No (Reference) |      |               |       |      |              |       |  |
| Mixed          | 3.37 | 1.14 to 9.95  | 0.028 | 1.32 | 0.39 to 4.44 | 0.658 |  |
| Yes            | 3.84 | 1.11 to 13.35 | 0.034 | 0.48 | 0.09 to 2.68 | 0.405 |  |

# Dysphagia

|               |      |                |       |  |  |  |  |
|---------------|------|----------------|-------|--|--|--|--|
| No            | 1.00 |                | *     |  |  |  |  |
| Not mentioned | 1.17 | 0.06 to 23.53  | 0.918 |  |  |  |  |
| Mixed         | 1.87 | 0.03 to 125.92 | 0.771 |  |  |  |  |
| Yes           | 1.42 | 0.04 to 52.58  | 0.849 |  |  |  |  |

\* Too few studies with information on dysphagia (only two studies reported on dysphagia), therefore, we did not include dysphagia in the multivariable model.

Incidence Rate Ratio:  $\exp(\text{coefficient})$ : how many times the incidence per 100 days is higher compared to the reference category, (in multivariable analysis: controlled for all other variables).

Table S5.B Sensitivity analyses where the time under risk for the patients with pneumonia was set to the same time as for those patients without pneumonia (i.e. as if they had the pneumonia all at the last day).

| Variable                            | Univariable Meta-Regression |               |         | Multivariable Meta-Regression |               |         |
|-------------------------------------|-----------------------------|---------------|---------|-------------------------------|---------------|---------|
|                                     | Incidence Rate Ratio        | 95% CI        | p-value | Incidence Rate Ratio          | 95% CI        | p-value |
| Setting                             |                             |               |         |                               |               |         |
| Post-Rehab (Reference)              | 1.00                        |               |         | 1.00                          |               |         |
| Acute                               | 3.21                        | 0.93 to 11.11 | 0.066   | 0.67                          | 0.16 to 2.86  | 0.591   |
| ICU                                 | 6.41                        | 1.98 to 20.71 | 0.002   | 1.66                          | 0.3 to 9.23   | 0.563   |
| Long-Term Ventilation               | 1.30                        | 0.15 to 11.09 | 0.813   | 0.84                          | 0.07 to 10.76 | 0.895   |
| Mixed                               | 2.47                        | 0.29 to 20.75 | 0.404   | 13.25                         | 1.5 to 116.97 | 0.020   |
| Rehab                               | 3.36                        | 0.62 to 18.28 | 0.160   | 0.72                          | 0.12 to 4.37  | 0.720   |
| Level of Injury                     |                             |               |         |                               |               |         |
| Persons w. Paraplegia (Reference)   | 1.00                        |               |         |                               |               |         |
| Mixed, > 50% Persons w. Paraplegia  | 0.25                        | 0.02 to 3.15  | 0.286   | 0.19                          | 0.01 to 0.01  | 0.225   |
| Mixed, > 50% Persons w. Tetraplegia | 2.14                        | 0.23 to 19.79 | 0.503   | 3.27                          | 0.45 to 0.45  | 0.241   |
| Persons w. Tetraplegia              | 1.74                        | 0.19 to 15.84 | 0.621   | 1.94                          | 0.26 to 0.26  | 0.521   |
| Mixed, with unknown Proportion      | 0.49                        | 0.04 to 5.49  | 0.565   | 1.81                          | 0.18 to 0.18  | 0.613   |
| Ventilation                         |                             |               |         |                               |               |         |
| Not mentioned (Reference)           | 1.00                        |               |         |                               |               |         |
| Mixed                               | 3.79                        | 1.68 to 8.55  | 0.001   | 4.36                          | 1.56 to 12.19 | 0.005   |
| Ventilated                          | 3.95                        | 1.77 to 8.81  | 0.001   | 2.35                          | 0.82 to 6.73  | 0.112   |

# Tracheostomy

No (Reference)

Mixed

Yes

2.24

0.95 to 5.29

0.065

1.05

0.43 to 2.57

0.917

1.82

0.68 to 4.88

0.233

0.39

0.11 to 1.35

0.136

# Dysphagia

No

Not mentioned

Mixed

Yes

1.00

\*

0.83

0.09 to 8.05

0.874

1.98

0.08 to 51.21

0.680

0.99

0.07 to 15.09

0.995

\* Too few studies with information on dysphagia (only two studies reported on dysphagia), therefore, we did not include dysphagia in the multivariable model.

Incidence Rate Ratio:  $\exp(\text{coefficient})$ : how many times the incidence per 100 days is higher compared to the reference category, (in multivariable analysis: controlled for all other variables).
