# Supplementary material for: Systematic Review of Incidence Studies of Pneumonia in Persons with Spinal Cord Injury
Source: MDPI journal article supplement (doi:10.3390/jcm11010211), 2021-12-31
Supplement: s1 [file s1]

## PUBMED

| Search | Query                                                                                                                                                                                                                                                                                                                                                                                                                                   | Results |
|--------|-----------------------------------------------------------------------------------------------------------------------------------------------------------------------------------------------------------------------------------------------------------------------------------------------------------------------------------------------------------------------------------------------------------------------------------------|---------|
| #7     | #5 AND #4                                                                                                                                                                                                                                                                                                                                                                                                                               | 40      |
| #6     | #5 AND #3                                                                                                                                                                                                                                                                                                                                                                                                                               | 151     |
| #5     | #1 AND #2                                                                                                                                                                                                                                                                                                                                                                                                                               | 1.199   |
| #4     | (Prevalence [mh]) OR (prevalence* [tiab]))                                                                                                                                                                                                                                                                                                                                                                                              | 702.466 |
| #3     | (Incidence [mh]) OR (incidence* [tiab]))                                                                                                                                                                                                                                                                                                                                                                                                | 859.324 |
| #2     | Spinal Cord Injuries [mh] OR Spinal Cord Diseases [mh] OR Paraplegia [mh] OR Quadriplegia [mh] OR Spinal Injuries [mh]) OR (spinal cord injur* [tiab] myelopathy* [tiab] OR tetraplegia* [tiab]))                                                                                                                                                                                                                                       | 165.281 |
| #1     | (Pneumonia [mh] OR Pneumonia, Ventilator-Associated [mh] OR Pneumonia, Bacterial [mh] OR Pneumonia, Aspiration [mh]) OR (pneumonia* [tiab] OR experimental lung inflammation* [tiab] OR pneumonitis [tiab] OR pneumonitides [tiab] OR pulmonary inflammation* [tiab] OR lung inflammation* [tiab] OR lobar pneumonia* [tiab] OR pneumonia, aspiration [tiab] OR ventilator-associated pneumonia [tiab] OR bacterial pneumonia* [tiab])) | 219.442 |

## EMBASE (Excerpta Medica Database)

| Search | Query                                                                                   | Results   |
|--------|-----------------------------------------------------------------------------------------|-----------|
| #31    | #10 AND #24 AND #29 AND #30                                                             | 439       |
| #30    | 'adult'/exp OR 'adult'                                                                  | 8.209.639 |
| #29    | #25 OR #26 OR #27 OR #28                                                                | 1.965.065 |
| #28    | 'prevalence':ti OR 'prevalence':ab                                                      | 786.334   |
| #27    | 'prevalence'/exp OR prevalence                                                          | 955.565   |
| #26    | Incidence*:ti OR incidence*:ab                                                          | 996.418   |
| #25    | 'incidence'/exp OR 'incidence'                                                          | 1.114.538 |
| #24    | #11 OR #12 OR #13 OR #14 OR #15 OR #16 OR #17 OR #18 OR #19 OR #20 OR #21 OR #22 OR #23 | 363.536   |
| #23    | (traumatic AND myelopath*:ti OR traumatic) AND myelopath*:ab                            | 499       |
| #22    | (spinal AND cord AND laceration*:ti OR spinal) AND cord AND contusion*:ab               | 203       |
| #21    | (spinal AND cord AND injur*:ti OR spinal) AND cord AND contusion*:ab                    | 59.693    |
| #20    | (spinal AND cord AND contusion*:ti OR spinal) AND cord AND contusion*:ab                | 2.435     |
| #19    | (post AND traumatic AND myelopath*:ti OR post) AND traumatic AND myelopath*:ab          | 102       |
| #18    | (spinal AND cord AND trauma:ti OR spinal) AND cord AND trauma.ab                        | 8.522     |
| #17    | myelopath*:ti OR myelopath*:ab                                                          | 16.342    |
| #16    | tetraplegia:ti OR tetraplegia.ab                                                        | 3.908     |
| #15    | 'spinal cord injury'/exp OR 'spinal cord injury'                                        | 81.121    |
| #14    | 'spine injury'exp OR 'spine injury'                                                     | 53.087    |
| #13    | 'spinal cord disease'/exp OR 'spinal cord disease'                                      | 271.178   |
| #12    | 'paraplegia'/exp OR 'paraplegia'                                                        | 34.748    |
| #11    | 'quadriplegia'/exp OR quadriplegia                                                      | 17.507    |
| #10    | #1 OR #2 OR #3 OR #4 OR #5 OR #6 OR #7 OR #8 OR #9                                      | 386.732   |
| #9     | Pneumonitides                                                                           | 24        |
| #8     | 'experimental pneumonia'/exp OR 'experimental pneumonia'                                | 456       |
| #7     | Pneumonitis:ti OR pneumonitis:ab                                                        | 20.507    |
| #6     | (pulmonary AND inflammation.ti OR pulmonary) AND inflammation*.ab                       | 41.286    |
| #5     | ((('lung'/exp OR lung) AND inflammation*.ti OR 'lung'exp OR lung) AND inflammation*.ab  | 74.069    |
| #4     | 'virus pneumonia'/exp OR 'virus pneumonia'                                              | 15.049    |
| #3     | 'Bacterial pneumonia'/exp OR 'bacterial pneumonia'                                      | 31.038    |
| #2     | Pneumonia, AND (aspiration/exp OR aspiration)                                           | 23.431    |

|    |                             |        |
|----|-----------------------------|--------|
| #1 | Pneumonia /exp OR pneumonia | 319958 |
|----|-----------------------------|--------|

#### MEDLINE (Ovid)

| Search | Query                                                                                                                                      | Results   |
|--------|--------------------------------------------------------------------------------------------------------------------------------------------|-----------|
| #16    | 10 and 15                                                                                                                                  | 96        |
| #15    | 11 or 13                                                                                                                                   | 1.439.831 |
| #14    | 10 and 13                                                                                                                                  | 20        |
| #13    | Prevalence/or prevalence.mp.                                                                                                               | 689.917   |
| #12    | 10 and 11                                                                                                                                  | 79        |
| #11    | Incidence.mp. or incidence/                                                                                                                | 834.094   |
| #10    | 8 and 9                                                                                                                                    | 563       |
| #9     | Pneumonia, Ventilator-Associated/ or Pneumonia/ or Pneumonia, Bacterial/<br>or Pneumonia virus/ or Pneumonia, Aspiration/ or Pneumonia.mp. | 152.207   |
| #8     | 1 or 2 or 3 or 4 or 5 or 6 or 7                                                                                                            | 90.279    |
| #7     | Myelopathy.mp.                                                                                                                             | 13.065    |
| #6     | Tetraplegia.mp.                                                                                                                            | 3.117     |
| #5     | Spinal Injuries.mp. or Spinal Injuries/                                                                                                    | 9.961     |
| #4     | Quadriplegia.mp. or Quadriplegia/                                                                                                          | 9.521     |
| #3     | Paraplegia/ or Paraplegia.mp.                                                                                                              | 20.106    |
| #2     | Spinal Cord Diseases.mp. of Spinal Cord Diseases/                                                                                          | 12.724    |
| #1     | Spinal Cord Injuries.mp. or Spinal Cord Injuries/                                                                                          | 39.109    |

#### Cochrane Central Register of Controlled Trials (CENTRAL)

| Search | Query                                                        | Results |
|--------|--------------------------------------------------------------|---------|
| #11    | #9 AND #10                                                   | 0       |
| #10    | #4 OR #5 OR #6                                               | 3.111   |
| #9     | #1 OR #2 OR #3                                               | 1.062   |
| #8     | MeSH descriptor: [Incidence] explode all trees               | 9.454   |
| #7     | MeSH descriptor: [Cross Sectional Studies] explode all trees | 4.570   |
| #6     | MeSH descriptor: [Pneumonia, Bacterial] explode all trees    | 730     |
| #5     | MeSH descriptor: [Pneumonia, Aspiration] explode all trees   | 312     |
| #4     | MeSH descriptor: [Pneumonia] explode all trees               | 3.111   |
| #3     | MeSH descriptor: [Spinal Injuries] explode all trees         | 741     |
| #2     | MeSH descriptor: [Quadriplegia] explode all trees            | 174     |
| #1     | MeSH descriptor: [Paraplegia] explode all trees              | 195     |

ab = abstract

exp = explode term (search under all subheadings)

MeSH = Medical Subjects Headings, The National Library of Medicine controlled vocabulary for indexing articles in PubMed

mp. = keyword search

ti = title
