# Supplementary material for: Systematic Review of Incidence Studies of Pneumonia in Persons with Spinal Cord Injury
Source: J Clin Med. 2021 Dec 31;11(1):211. doi: 10.3390/jcm11010211 (PMC8745509; doi:10.3390/jcm11010211)
Supplement: Supplementary file 1 [file jcm-11-00211-s001.zip]

Archive with 5 entries (5 files):
- Supplementary File S1_Search Strategy.pdf
- Supplementary File S2_Risk-of-bias-tool-Hoy.pdf
- Supplementary File S3_Risk of Bias assessment summary.pdf
- Supplementary File S4_List of excluded Fulltexts.pdf
- Supplementary File S5  Sensitivity analyses with two alternative calculations of the time under risk_Revision_2.pdf
